# Supplementary material for: Axle charge effects on photoinduced electron transfer processes in rotaxanes containing porphyrin and [60]fullerene
Source: Royal Society of Chemistry journal article supplement (doi:10.1039/b913966d), 2009-01-01
Supplement: b913966d.pdf [file b913966d.pdf]

*Supporting Information*

2009/07/06

**Axle charge effects on photoinduced electron transfer  
processes in rotaxanes containing porphyrin and [60]fullerene**

**Hisahiro Sasabe,<sup>a,b</sup> Atula S. D. Sandanayaka,<sup>c,d</sup> Nobuhiro Kihara,<sup>b,c</sup> Yoshio Furusho,<sup>b,d</sup> Toshikazu Takata,<sup>b,f,\*</sup> Yasuyuki Araki<sup>d</sup> and Osamu Ito<sup>d,\*</sup>**

<sup>a</sup> Address, Department of Organic Device Engineering, Yamagata University, 4-3-16  
Jonan, Yonezawa, Yamagata, 992-8510, Japan. E-mail:

[h-sasabe@yz.yamagata-u.ac.jp](mailto:h-sasabe@yz.yamagata-u.ac.jp).

<sup>b</sup> Department of Applied Chemistry, Osaka prefecture University, Sakai, 599-8531,  
Japan.

<sup>c</sup> Address, Japan Advanced Institute of Science and Technology, Asahidai, Nomi,  
923-1292 (Japan) E-mail: [sandanay@jaist.ac.jp](mailto:sandanay@jaist.ac.jp)

<sup>d</sup> Address, IMRAM, Tohoku University, Katahira 2-1-1, Aoba-ku, Sendai, 980-8577  
Japan; E-mail: [ito@tagen.tohoku.ac.jp](mailto:ito@tagen.tohoku.ac.jp)

<sup>e</sup> Department of Chemistry, Kanagawa University, Tsuchiya, Hiratsuka 259-1293, Japan,  
E-mail: [kihara@kanagawa-u.ac.jp](mailto:kihara@kanagawa-u.ac.jp)

<sup>f</sup> Department of Molecular Design and Engineering, Nagoya University, E-mail:  
[furusho@apchem.nagoya-u.ac.jp](mailto:furusho@apchem.nagoya-u.ac.jp)

<sup>g</sup> Department of Organic and Polymeric Materials, Tokyo Institute of Technology,  
Ookayama, Meguro-ku, Tokyo, 152-8552, Japan. E-mail:  
[ttakata@polymer.titech.ac.jp](mailto:ttakata@polymer.titech.ac.jp)

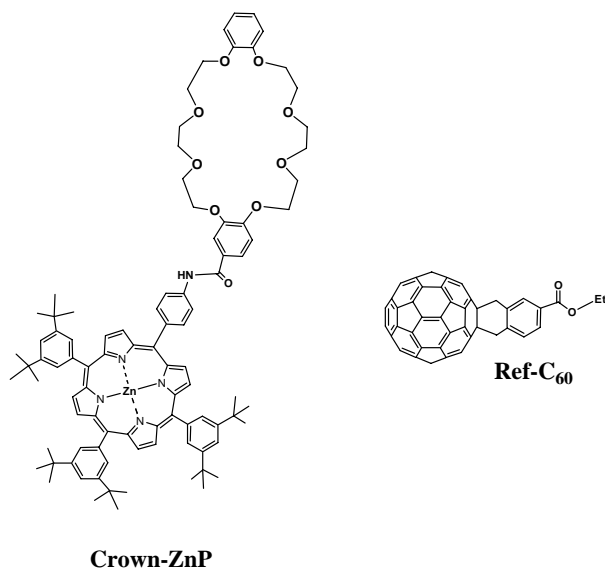

**Scheme S1.** Molecular structures of references Crown-**ZnP**<sup>ref-1</sup> and Ref-**C<sub>60</sub>**.<sup>ref-2</sup>

<sup>ref-1</sup> H. Sasabe, Y. Furusho, A.S. D. Sandanayaka, Y. Araki, N. Kihara, K. Mizuno, A. Ogawa, T. Takata, O. Ito, *J. Porphyrins Phthalocyanines* **2006**, *10*, 1346-1359

<sup>ref-2</sup> A. S. D. Sandanayaka, K. Ikeshita, G. A. Rajkumar, Y. Furusho, Y. Araki, T. Takata, O. Ito, *J. Phys. Chem. A* **2005**, *109*, 8088-8095.

**Table S1.** Free-energy changes of charge-recombination ( $\Delta G_{CR}$ ) of  $(C_{60}(N);ZnP)_{Rot}$  and  $(C_{60}(N^+);ZnP)_{Rot}$  in DMF, PhCN, THF, and toluene

| Rotaxanes                 | Solvs.  | $-\Delta G_{CR}^a$<br>( $C_{60};ZnP$ ) |
|---------------------------|---------|----------------------------------------|
| $(C_{60}(N);ZnP)_{Rot}$   | DMF     | 1.22                                   |
|                           | PhCN    | 1.24                                   |
|                           | THF     | 1.37                                   |
|                           | TN      | 1.79                                   |
| $(C_{60}(N^+);ZnP)_{Rot}$ | DMF     | 1.17                                   |
|                           | PhCN    | 1.19                                   |
|                           | THF     | 1.25                                   |
|                           | toluene | 1.45                                   |

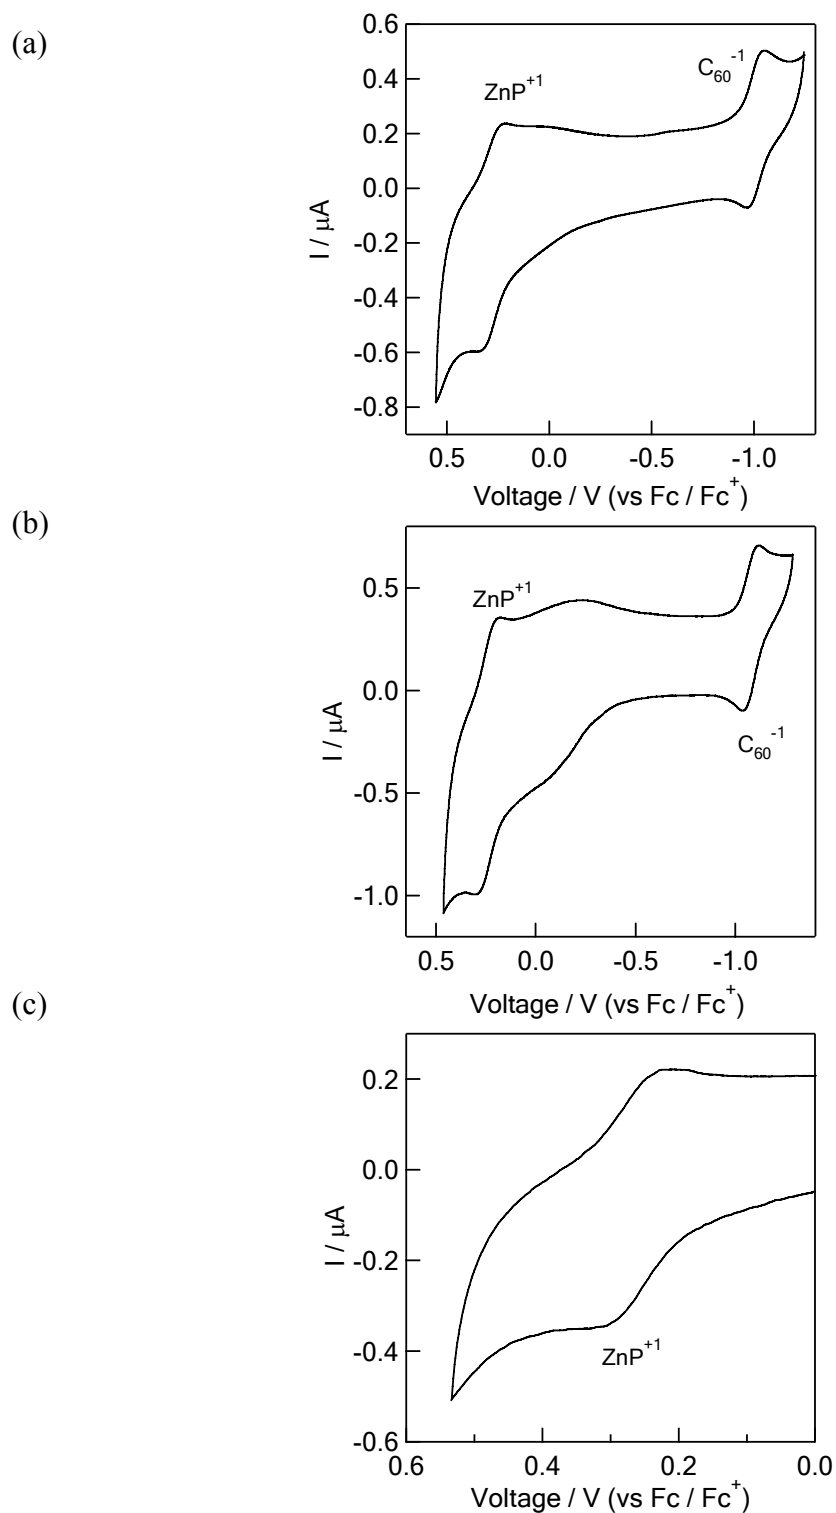

**Fig. S1.** Cyclic voltammograms in PhCN at scan rate of 100 mV/s at room temperature; (a)  $(\text{C}_{60}(\text{N});\text{ZnP})_{\text{Rot}}$  (b)  $(\text{C}_{60}(\text{N}^+);\text{ZnP})_{\text{Rot}}$  (c) Crown-ZnP.

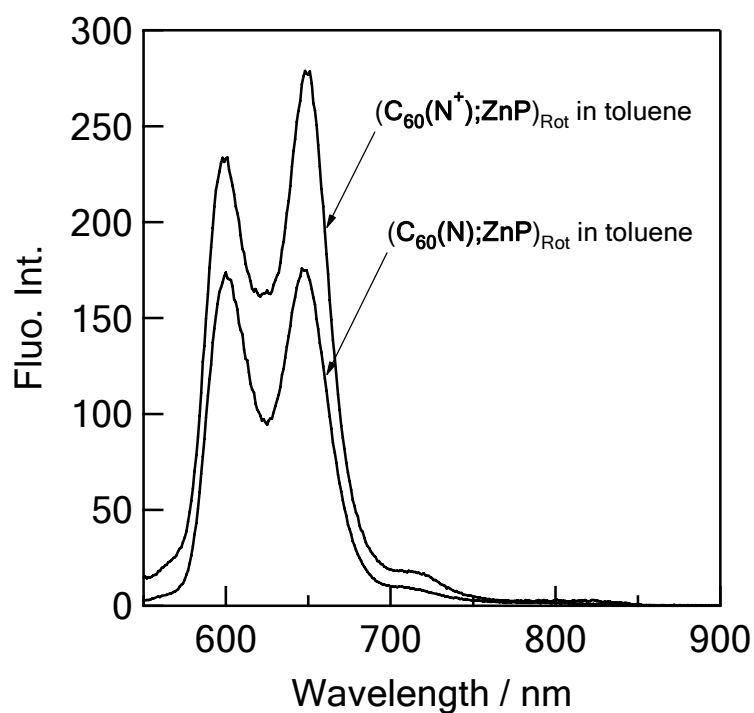

**Fig. S2.** Steady-state fluorescence spectra of  $(C_{60}(N);ZnP)_{Rot}$  and  $(C_{60}(N^+);ZnP)_{Rot}$  (0.1 mM) in toluene  $\lambda_{ex} = 550$  nm.

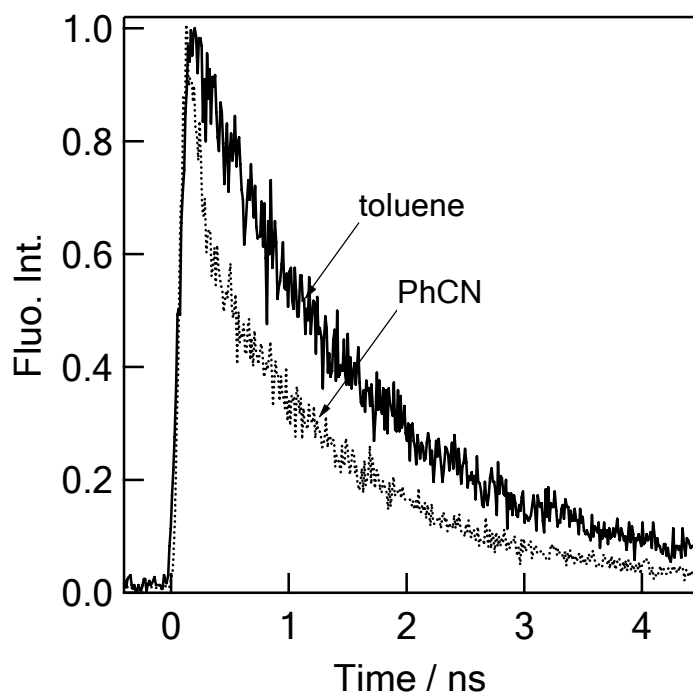

**Fig. S3.** Time profiles of the fluorescence at 720-800 nm of  $(C_{60}(N);ZnP)_{Rot}$  in PhCN and toluene. Excitation wavelength was 410 nm.

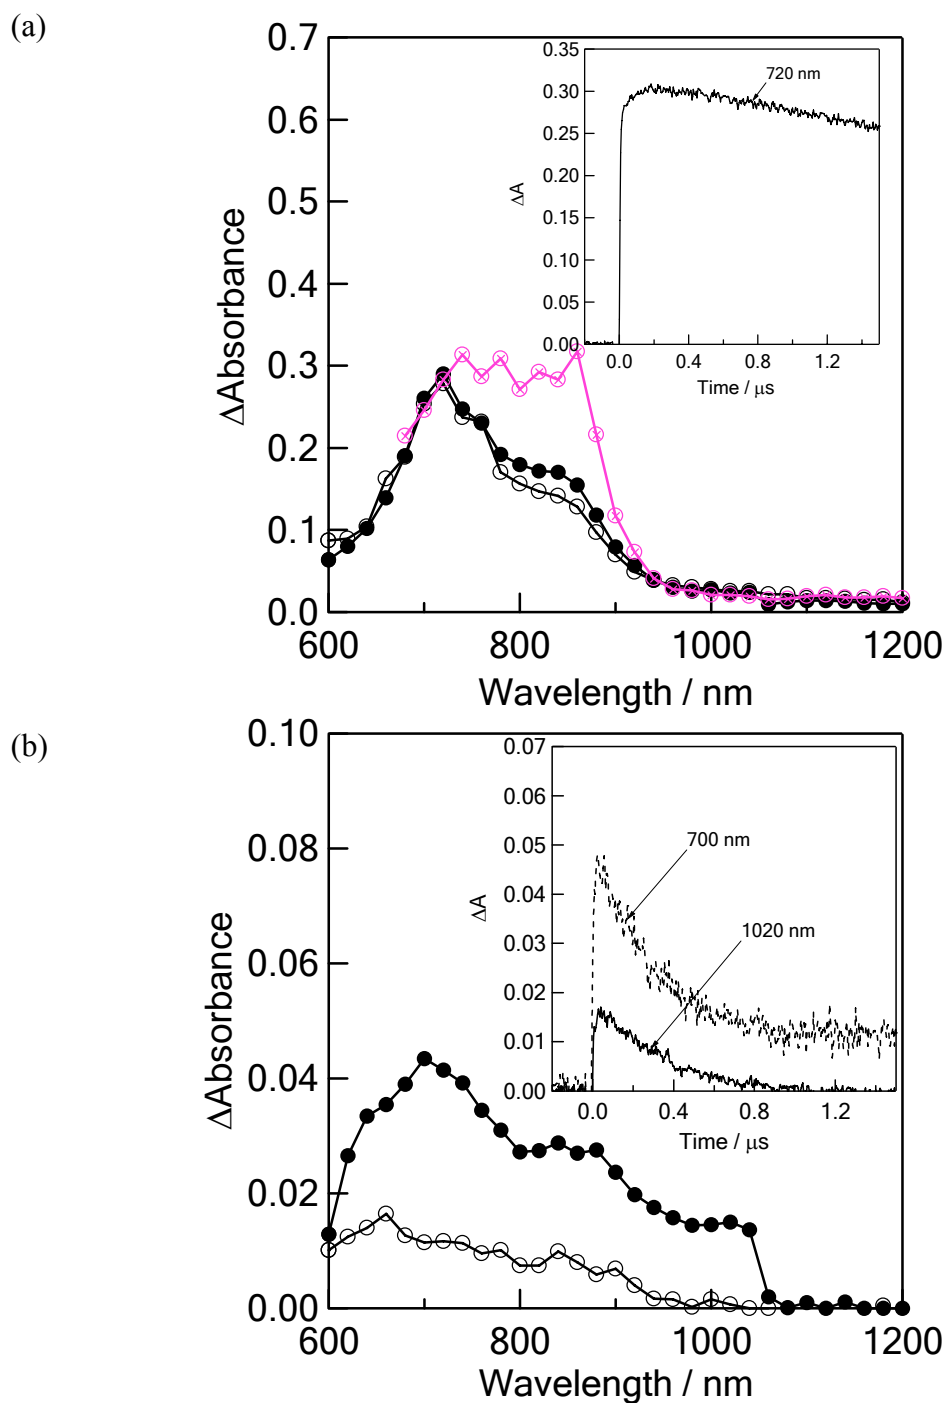

**Fig. S4.** Nanosecond transient absorption spectra of (a)  $(C_{60}(N);ZnP)_{Rot}$  and Crown-ZnP (pink) at 0.1  $\mu s$  (b)  $(C_{60}(N^+);ZnP)_{Rot}$  (0.1mM) observed by 550 nm laser light irradiation in at 0.1  $\mu s$  (●) and 1.0  $\mu s$  (○) in toluene. Inset: Absorption-time profiles in toluene.

Reference 14 A. *Gaussian 03*, Revision A.7; Gaussian, Inc.: Pittsburgh, PA, 2003 (ESI)

Gaussian 03, Revision C.02, M. J. Frisch, G. W. Trucks, H. B. Schlegel, G. E. Scuseria, M. A. Robb, J. R. Cheeseman, J. A. Montgomery, Jr., T. Vreven, K. N. Kudin, J. C. Burant, J. M. Millam, S. S. Iyengar, J. Tomasi, V. Barone, B. Mennucci, M. Cossi, G. Scalmani, N. Rega, G. A. Petersson, H. Nakatsuji, M. Hada, M. Ehara, K. Toyota, R. Fukuda, J. Hasegawa, M. Ishida, T. Nakajima, Y. Honda, O. Kitao, H. Nakai, M. Klene, X. Li, J. E. Knox, H. P. Hratchian, J. B. Cross, V. Bakken, C. Adamo, J. Jaramillo, R. Gomperts, R. E. Stratmann, O. Yazyev, A. J. Austin, R. Cammi, C. Pomelli, J. W. Ochterski, P. Y. Ayala, K. Morokuma, G. A. Voth, P. Salvador, J. J. Dannenberg, V. G. Zakrzewski, S. Dapprich, A. D. Daniels, M. C. Strain, O. Farkas, D. K. Malick, A. D. Rabuck, K. Raghavachari, J. B. Foresman, J. V. Ortiz, Q. Cui, A. G. Baboul, S. Clifford, J. Cioslowski, B. B. Stefanov, G. Liu, A. Liashenko, P. Piskorz, I. Komaromi, R. L. Martin, D. J. Fox, T. Keith, M. A. Al-Laham, C. Y. Peng, A. Nanayakkara, M. Challacombe, P. M. W. Gill, B. Johnson, W. Chen, M. W. Wong, C. Gonzalez, and J. A. Pople, Gaussian, Inc., Wallingford CT, 2004.
